# Supplementary material for: Silencing of Dicer enhances dacarbazine resistance in melanoma cells by inhibiting ADSL expression
Source: publisher site journal article supplement (doi:10.18632/aging.205207), 2023-11-15
Supplement: Supplementary file [file aging-v15i22-205207-supplementary-material-SD1.pdf]

SUPPLEMENTARY FIGURE

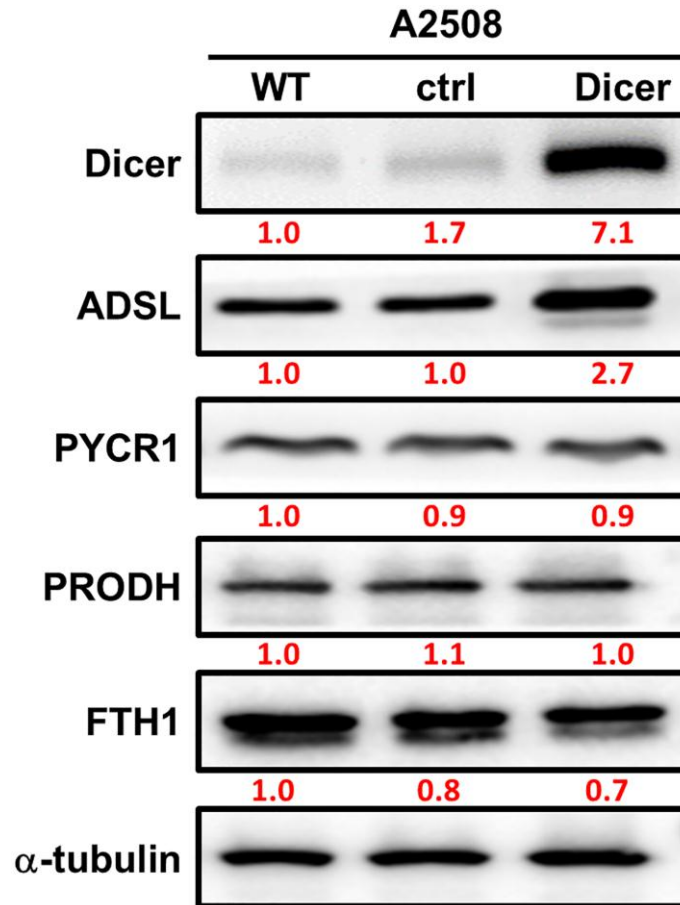

**Supplementary Figure 1. Dicer mediated metabolic pathway-associated enzymes in melanoma cells.** Western blotting results for metabolic pathway-associated enzymes in wild-type, ctrl, Dicer-overexpressed A2508 cells.
